# Supplementary material for: Regulation of Anderson localization for enhancing thermoelectric properties in Mn doped AgSbSe2 compounds
Source: Royal Society of Chemistry journal article supplement (doi:10.1039/d4ta09176k), 2025-01-01
Supplement: d4ta09176k1.pdf [file d4ta09176k1.pdf]

## Supplementary Information

### Regulation of Anderson localization for enhancing thermoelectric properties in Mn doped AgSbSe<sub>2</sub> compounds

Yaqiong Zhong,<sup>a</sup> Keke Liu,<sup>a</sup> Shuo Chen,<sup>a</sup> Hao Sang,<sup>a</sup> Xili Wen,<sup>a</sup> Qingjie Zhang,<sup>a</sup> Jinsong Wu,<sup>b</sup> Pierre Ferdinand Poudeu Poudeu,<sup>d</sup> Xianli Su,<sup>\*a</sup> Ctirad Uher,<sup>c</sup> Xinfeng Tang<sup>\*a</sup>

<sup>a</sup>State Key Laboratory of Advanced Technology for Materials Synthesis and Processing, Wuhan University of Technology, Wuhan 430070, China.

<sup>b</sup>Nanostructure Research Center, Wuhan University of Technology, Wuhan 430070, China.

<sup>c</sup>Department of Physics, University of Michigan, Ann Arbor, Michigan 48109, United States.

<sup>d</sup>Laboratory for Emerging Energy and Electronic Materials (LE3M), Department of Materials Science and Engineering, University of Michigan, Ann Arbor, Michigan 48109, United States.

*\*Corresponding authors: [suxianli@whut.edu.cn](mailto:suxianli@whut.edu.cn); [tangxf@whut.edu.cn](mailto:tangxf@whut.edu.cn)*

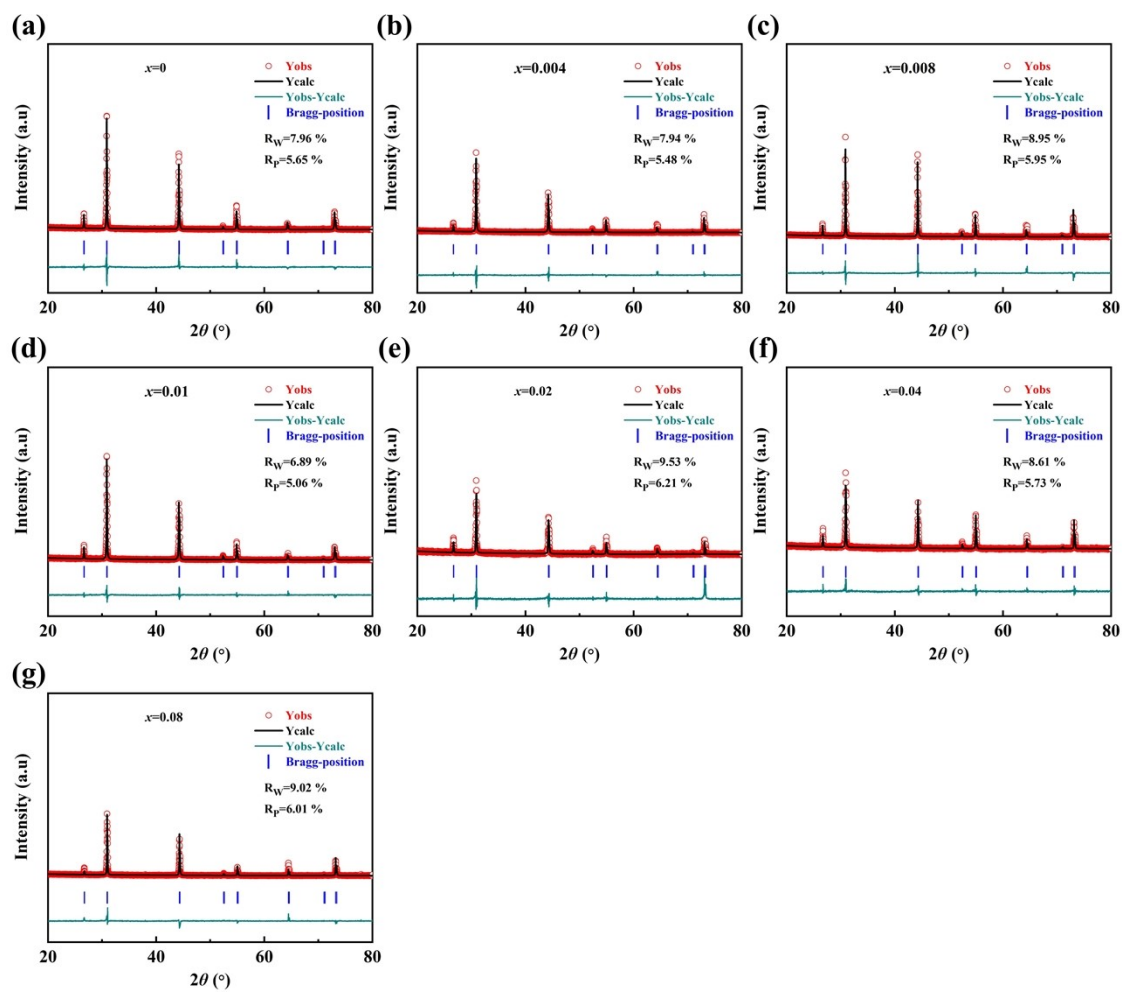

Fig. S1. Rietveld refinements of  $\text{AgSb}_{1-x}\text{Mn}_x\text{Se}_2$ .

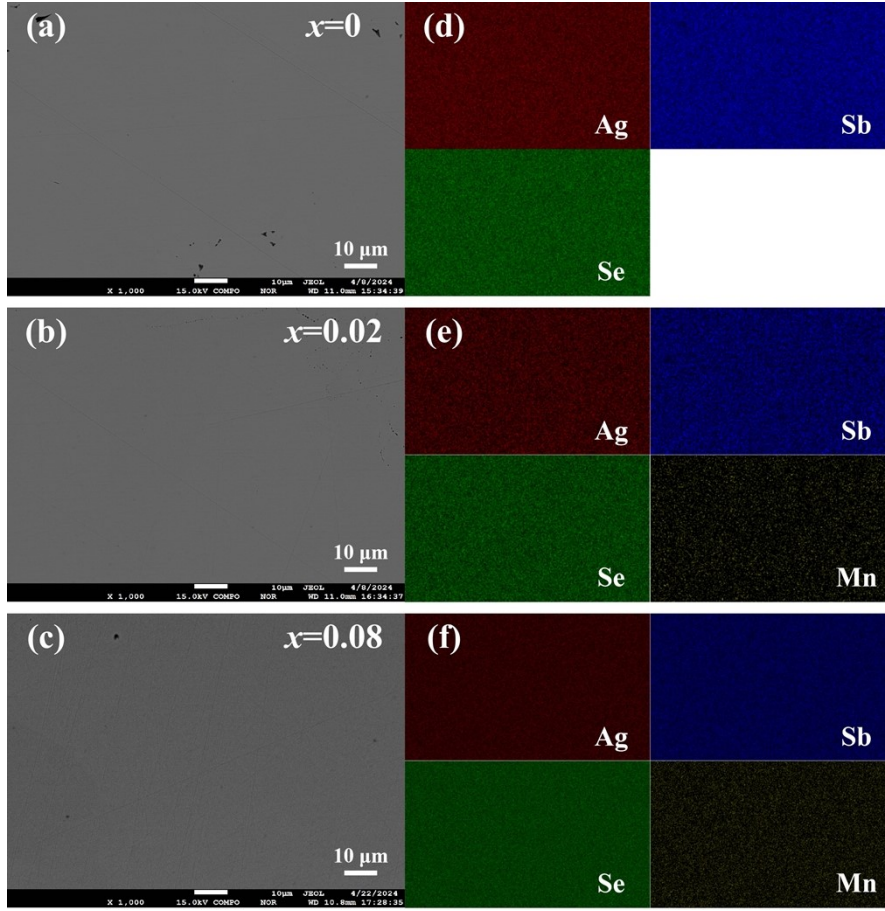

**Fig. S2.** (a)-(c) Back-scattered electron images and (d)-(f) energy-dispersive X-ray spectrometry elemental mappings of  $\text{AgSb}_{1-x}\text{Mn}_x\text{Se}_2$ .

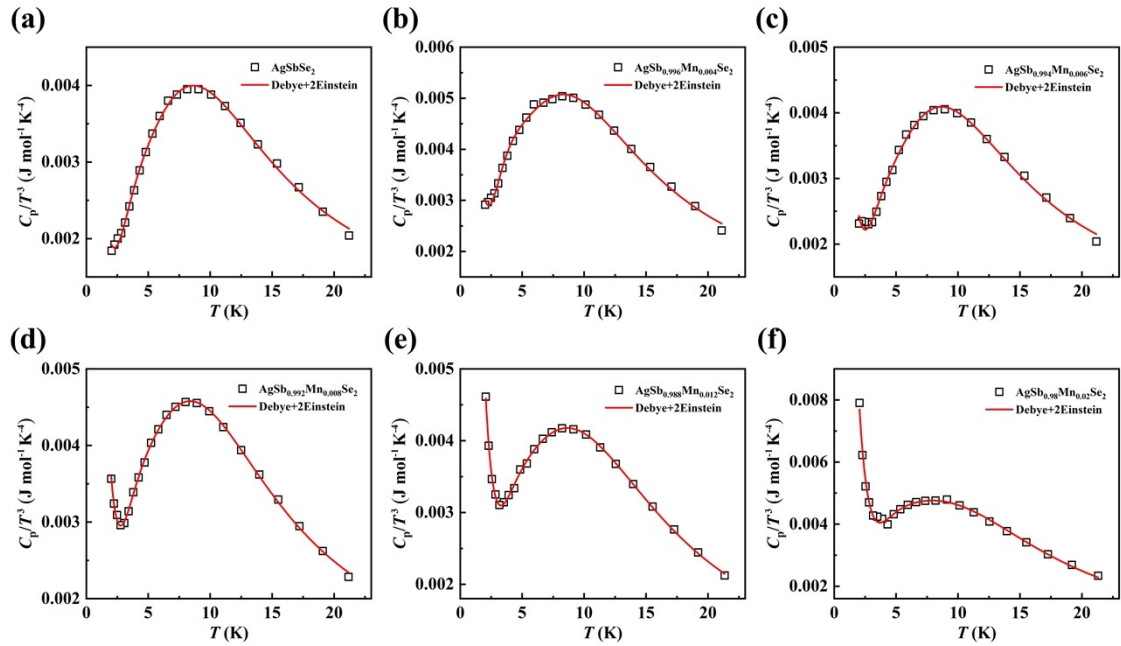

**Fig. S3.** The relationship between  $C_p/T^3$  and  $T$  for  $\text{AgSb}_{1-x}\text{Mn}_x\text{Se}_2$ . The Boson peak can be fitted only with the combined Debye-2Einstein model.

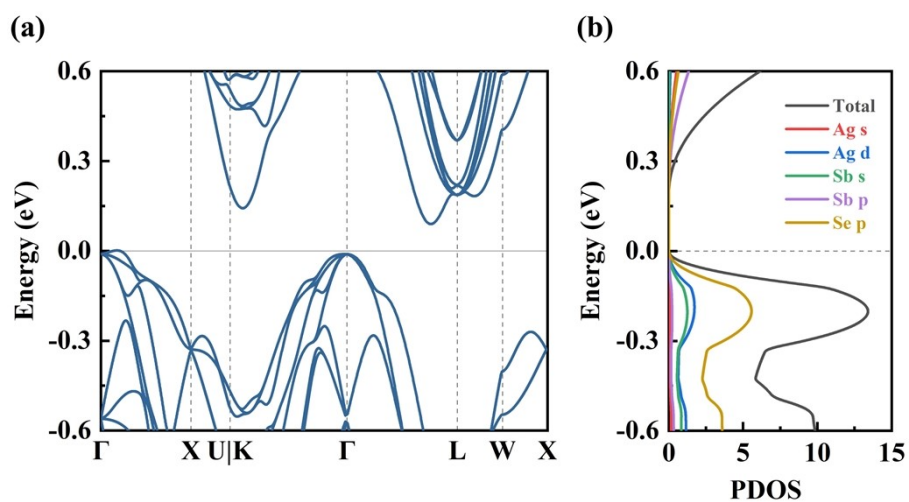

**Fig. S4.** Calculated band structure and PDOS of  $\text{Ag}_{16}\text{Sb}_{16}\text{Se}_{32}$ .

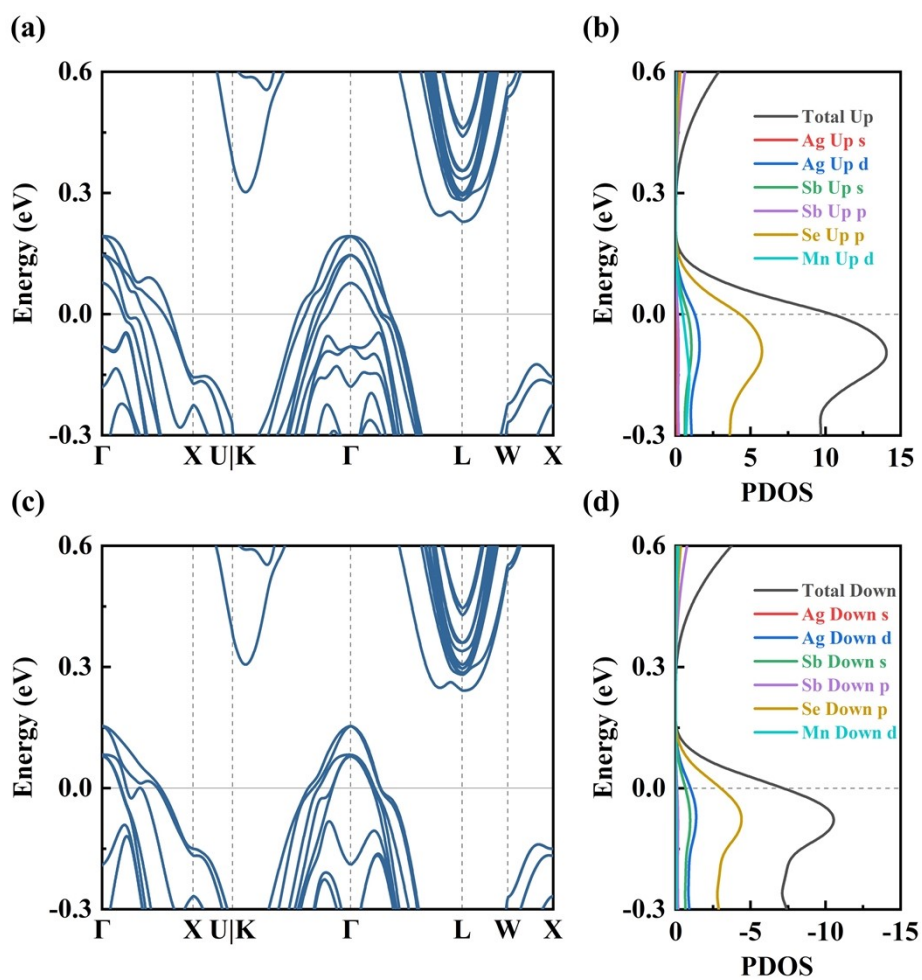

**Fig. S5.** Calculated band structure and PDOS of  $\text{Ag}_{16}\text{Sb}_{15}\text{MnSe}_{32}$ . (a)-(b) Spin-up, and (c)-(d) Spin-down.

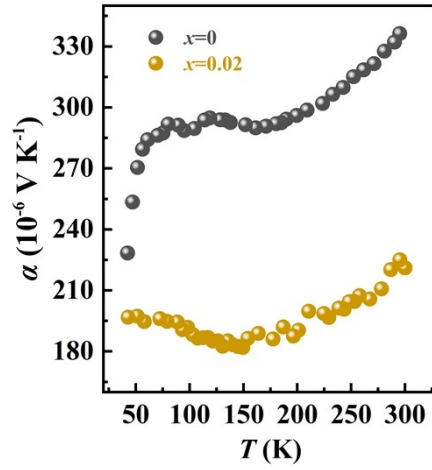

**Fig. S6.** Low temperature-dependent Seebeck coefficients ( $\alpha$ ) of pristine  $\text{AgSbSe}_2$  and 2% Mn doped  $\text{AgSbSe}_2$ .

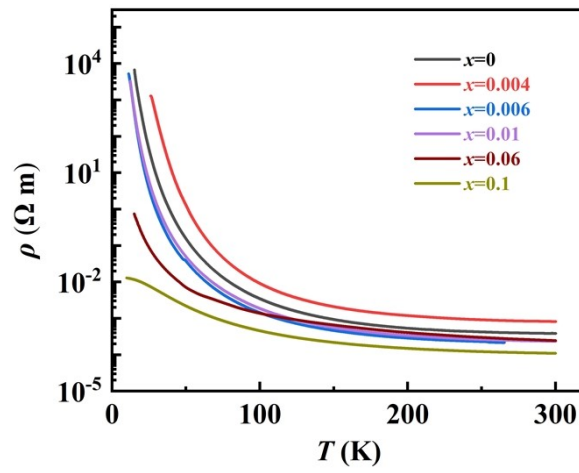

**Fig. S7.** Resistivity ( $\rho$ ) versus  $T$  plots of the samples  $\text{AgSb}_{1-x}\text{Mn}_x\text{Se}_2$ .

**Table S1.** Low temperature heat capacity parameters of  $\text{AgSb}_{1-x}\text{Mn}_x\text{Se}_2$ . Here,  $\gamma$  is the Sommerfeld constant,  $b$  is the Debye lattice term,  $A_i$  and  $\theta_{Ei}$  are the amplitude and the Einstein temperature of the  $i$ th Einstein oscillator mode.

| Parameters                                         | $x=0$ | $x=0.004$ | $x=0.006$ | $x=0.008$ | $x=0.012$ | $x=0.02$ |
|----------------------------------------------------|-------|-----------|-----------|-----------|-----------|----------|
| $\gamma$<br>( $\text{mJ mol}^{-1} \text{K}^{-2}$ ) | 2.65  | 6.18      | 4.79      | 9.38      | 15.46     | 29.67    |
| $b$<br>( $\text{mJ mol}^{-1} \text{K}^{-4}$ )      | 1.2   | 1.29      | 1.18      | 1.2       | 0.92      | 0.62     |
| $A_1$                                              | 1.23  | 1.56      | 1.25      | 1.8       | 2.28      | 3.9      |
| $\theta_{E1}$ (K)                                  | 25.69 | 23.8      | 25.85     | 26.63     | 29.01     | 30.96    |
| $A_2$                                              | 12.22 | 16.5      | 12.8      | 14.79     | 16.82     | 23.59    |
| $\theta_{E2}$ (K)                                  | 51.07 | 51.46     | 51.1      | 52.81     | 57.01     | 62.03    |

**Table S2.** Basic parameters of the  $\kappa_F\lambda$  versus  $T$  for  $\text{AgSbSe}_2$

| $T$ (K) | $\sigma$ ( $\Omega^{-1} \text{m}^{-1}$ ) | $n_H$ ( $10^{18} \text{cm}^{-3}$ ) | $\mu_w$ ( $\text{cm}^2 \text{v}^{-1} \text{s}^{-1}$ ) | $\kappa_F\lambda$ |
|---------|------------------------------------------|------------------------------------|-------------------------------------------------------|-------------------|
| 40      | 0.02                                     | 0.625                              | 0.02                                                  | 0.000125          |
| 60      | 0.614                                    | 3.37                               | 0.11                                                  | 0.00218           |
| 100     | 10.346                                   | 6.10                               | 1.06                                                  | 0.03              |
| 150     | 44.26                                    | 12                                 | 2.3                                                   | 0.1029            |
| 300     | 224                                      | 18                                 | 7.3                                                   | 0.45              |

**Table S3.** Basic parameters of the  $\kappa_F\lambda$  versus  $T$  for  $\text{AgSb}_{0.99}\text{Mn}_{0.01}\text{Se}_2$

| $T$ (K) | $\sigma$ ( $\Omega^{-1} \text{m}^{-1}$ ) | $n_H$ ( $10^{18} \text{cm}^{-3}$ ) | $\mu_w$ ( $\text{cm}^2 \text{v}^{-1} \text{s}^{-1}$ ) | $\kappa_F\lambda$ |
|---------|------------------------------------------|------------------------------------|-------------------------------------------------------|-------------------|
| 14      | 0.66                                     | 9.4                                | 0.00443                                               | 0.0007728         |
| 20      | 6.5                                      | 2.4                                | 0.2065                                                | 0.01199           |
| 47      | 7.24                                     | 0.3                                | 1.4731                                                | 0.0267            |
| 70      | 25                                       | 0.58                               | 2.6694                                                | 0.07389           |
| 97      | 91                                       | 1.35                               | 4.2032                                                | 0.20323           |
| 120     | 131                                      | 2.02                               | 4.0501                                                | 0.2556            |
| 154     | 172                                      | 2.43                               | 4.4230                                                | 0.3159            |
| 300     | 3015                                     | 3.7                                | 50.89                                                 | 4.8               |

**Table S4.** Summary of the physical parameters of  $\text{AgSb}_{1-x}\text{Mn}_x\text{Se}_2$ 

| Parameters                                                      | $x=0$                 | $x=0.004$             | $x=0.006$             | $x=0.008$             | $x=0.012$            | $x=0.02$              |
|-----------------------------------------------------------------|-----------------------|-----------------------|-----------------------|-----------------------|----------------------|-----------------------|
| $\sigma_{300\text{K}}$ (S $\text{m}^{-1}$ )                     | 250                   | 3823                  | 2044                  | 4350                  | 5916                 | 8246                  |
| $N(E_{\text{F}})_{\text{Cp}}$ ( $\text{m}^{-3} \text{J}^{-1}$ ) | $1.28 \times 10^{45}$ | $2.99 \times 10^{45}$ | $2.32 \times 10^{45}$ | $4.54 \times 10^{45}$ | $7.5 \times 10^{45}$ | $1.44 \times 10^{46}$ |
